# Supplementary material
Source: PubMed Central journal article supplement (PMC3859743)
Supplement: hvi-9-250-s01.pdf [file hvi-9-250-s01.pdf]

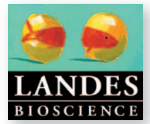

## **Supplemental Material to:**

**Ghaith Bakdash, Laura P. Schneider, Toni M.M. van Capel,  
Martien L. Kapsenberg, Marcel B.M. Teunissen  
and Esther C. de Jong**

**Intradermal application of vitamin D3 increases migration  
of CD14+ dermal dendritic cells and promotes the  
development of Foxp3+ regulatory T cells**

**2013; 9(2)**

**<http://dx.doi.org/10.4161/hv.22918>**

**[www.landesbioscience.com/journals/vaccines/article/22918](http://www.landesbioscience.com/journals/vaccines/article/22918)**

## Supplementary Figure 1

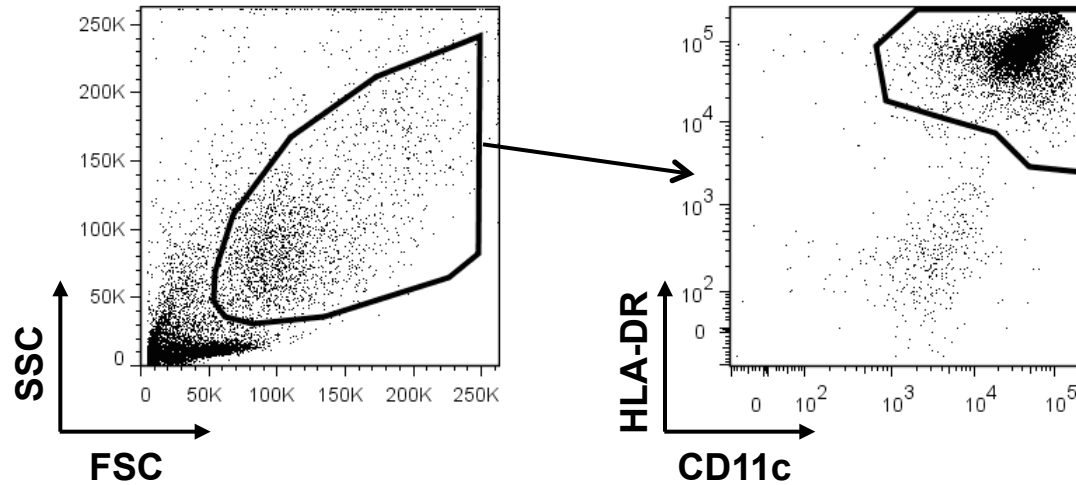

Skin crawl-out DCs were identified by their typical high sideward (SSC) and forward (FSC) scatter properties and their distinctive high expression of HLA-DR and CD11c.

## Supplementary Figure 2

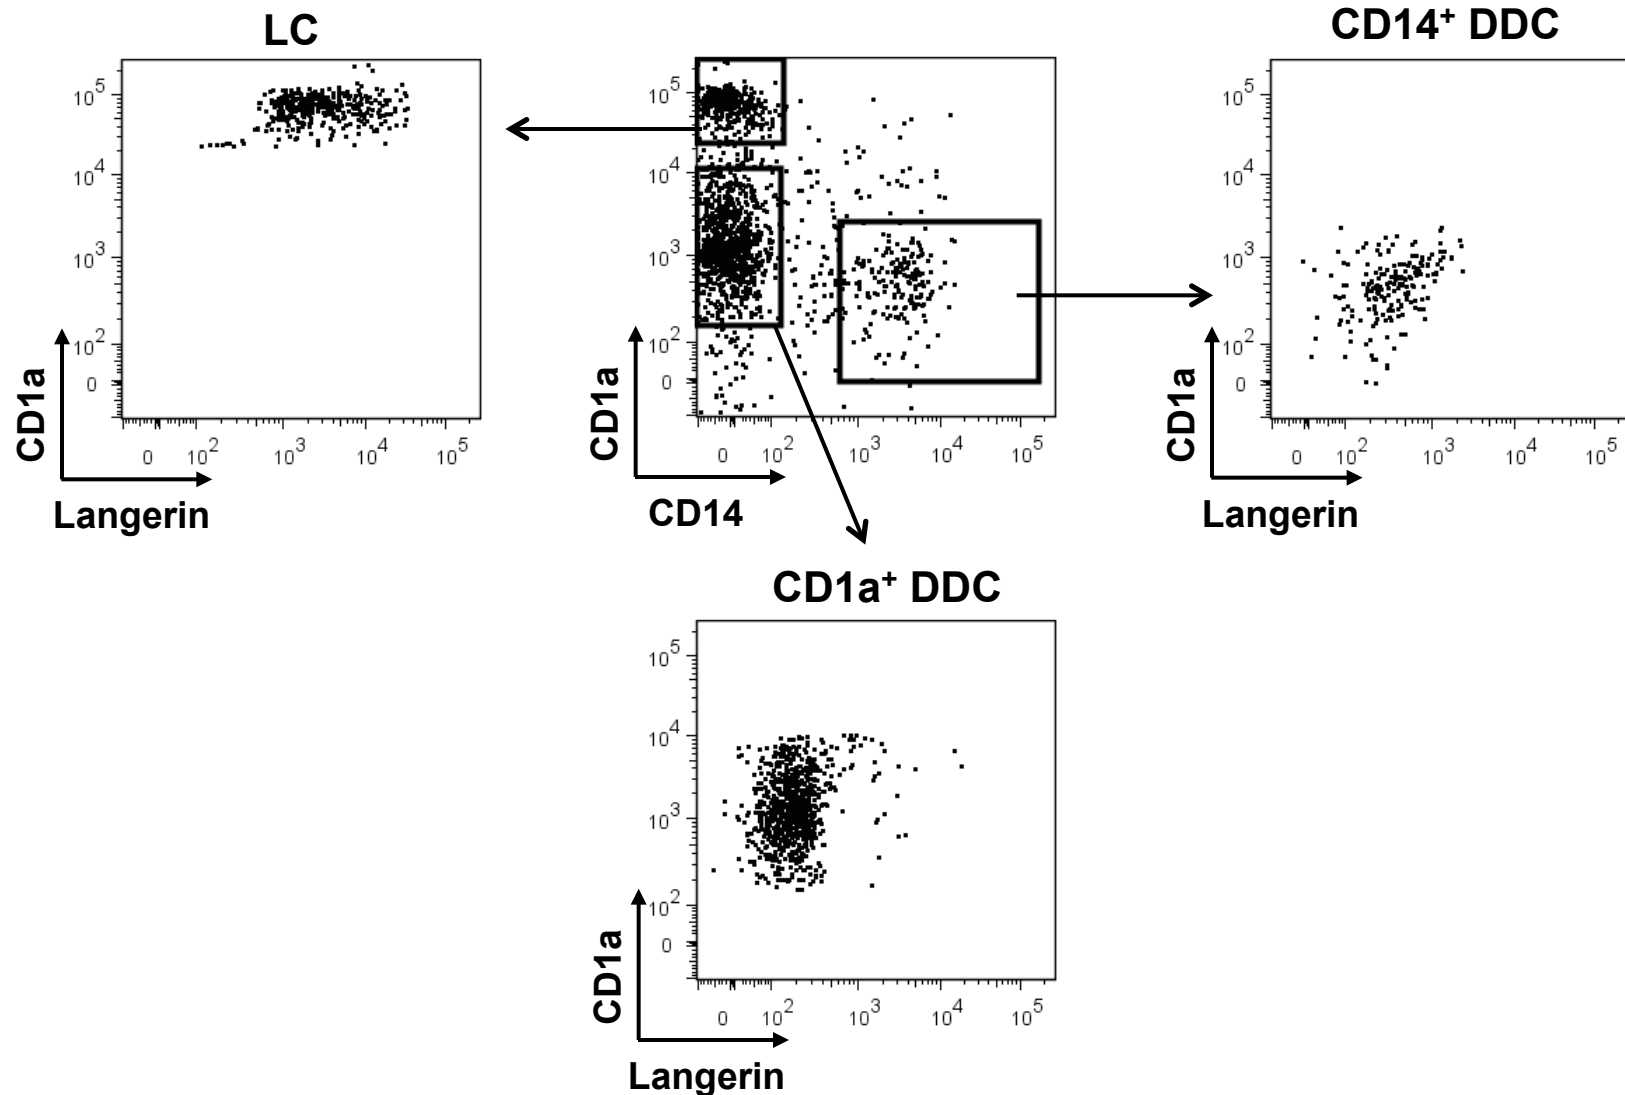

Within crawl-out DCs, three skin DC subsets could be distinguished based on their expression of CD1a, CD14 and langerin: LCs were langerin<sup>+</sup>CD1a<sup>high</sup>CD14<sup>-</sup>, whereas the two populations of DDCs both lacked expression of langerin and were either CD14<sup>+</sup>CD1a<sup>-</sup> or CD14<sup>-</sup>CD1a<sup>low</sup>.
